# Supplementary material for: Lipid droplet–mediated ER homeostasis regulates autophagy and cell survival during starvation
Source: PubMed Central journal article supplement — J Cell Biol. 2016 Mar 14;212(6):621–31. doi: 10.1083/jcb.201508102 (PMC4792078; doi:10.1083/jcb.201508102), 2016-03-14
Supplement: JCB_201508102_sm.pdf [file JCB_201508102_sm.pdf]

Velázquez et al., <http://www.jcb.org/cgi/content/full/jcb.201508102/DC1>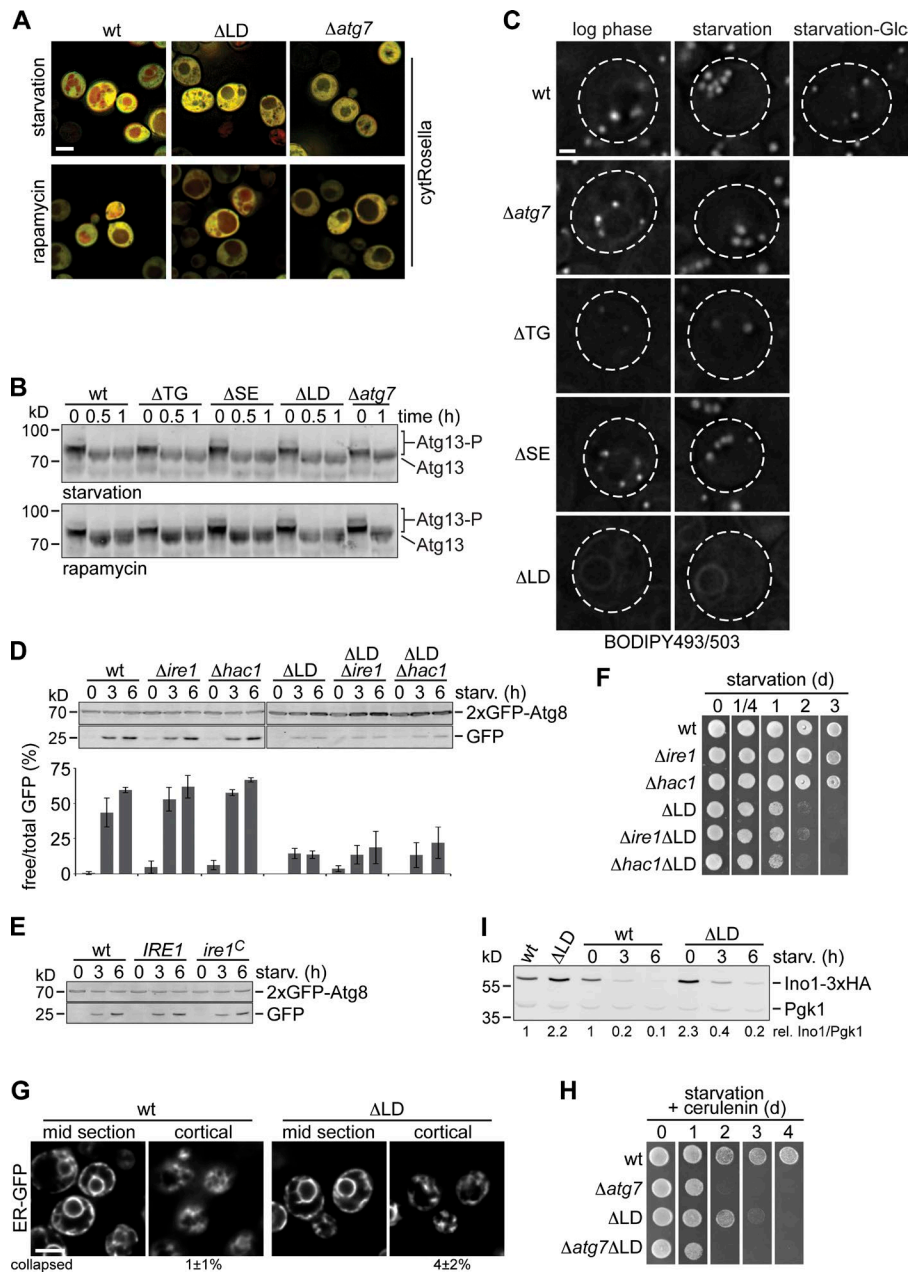

Figure S1. **Additional characterization of cells deficient in LD biogenesis.** (A) wt,  $\Delta$ LD, and  $\Delta$ atg7 cells expressing a plasmid-encoded cytRosella (pHluorin-mCherry) were grown to log phase, starved or treated with rapamycin, and imaged by fluorescence microscopy after 6 h. Red fluorescent signal in vacuoles indicates autophagy flux. Bar, 5  $\mu$ m. (B) Atg13 phosphorylation during starvation or rapamycin treatment by whole-cell extraction and Western blot analysis using an  $\alpha$ -Atg13 antibody. (C) Fluorescence microscopy images of the data shown in Fig. 2 A. Dashed lines indicate cell boundaries. Bar, 1  $\mu$ m. (D) Autophagy flux in wt,  $\Delta$ ire1,  $\Delta$ hac1,  $\Delta$ LD,  $\Delta$ LD $\Delta$ ire1, and  $\Delta$ LD $\Delta$ hac1 cells expressing 2xGFP-ATG8 during starvation (starv.). Data are mean  $\pm$  SD ( $n = 3$ ). (E) Autophagy flux in wt or  $\Delta$ ire1 cells coexpressing 2xGFP-ATG8 and a plasmid encoded *IRE1* or constitutively active *IRE1* allele (*ire1<sup>C</sup>*), respectively, during starvation (starv.). (F) Survival of indicated strains during starvation. (G) wt and  $\Delta$ LD cells expressing GFP-HDEL (ER-targeted GFP) were imaged after 1 h of rapamycin treatment. Images show single cortical and mid sections of the same cells. Quantifications of cells with a collapsed ER network are means  $\pm$  SDs ( $\geq 150$  cells;  $n = 3$ ). (H) Survival of indicated strains during starvation + cerulenin (10  $\mu$ g/ml). (I) wt and  $\Delta$ LD expressing genomically 3xHA-tagged *INO1* were grown to log phase and shifted to starvation (starv.). Cells were analyzed at indicated time points by whole-cell extraction and Western blot analysis using  $\alpha$ -HA and  $\alpha$ -Pgk1 antibodies.

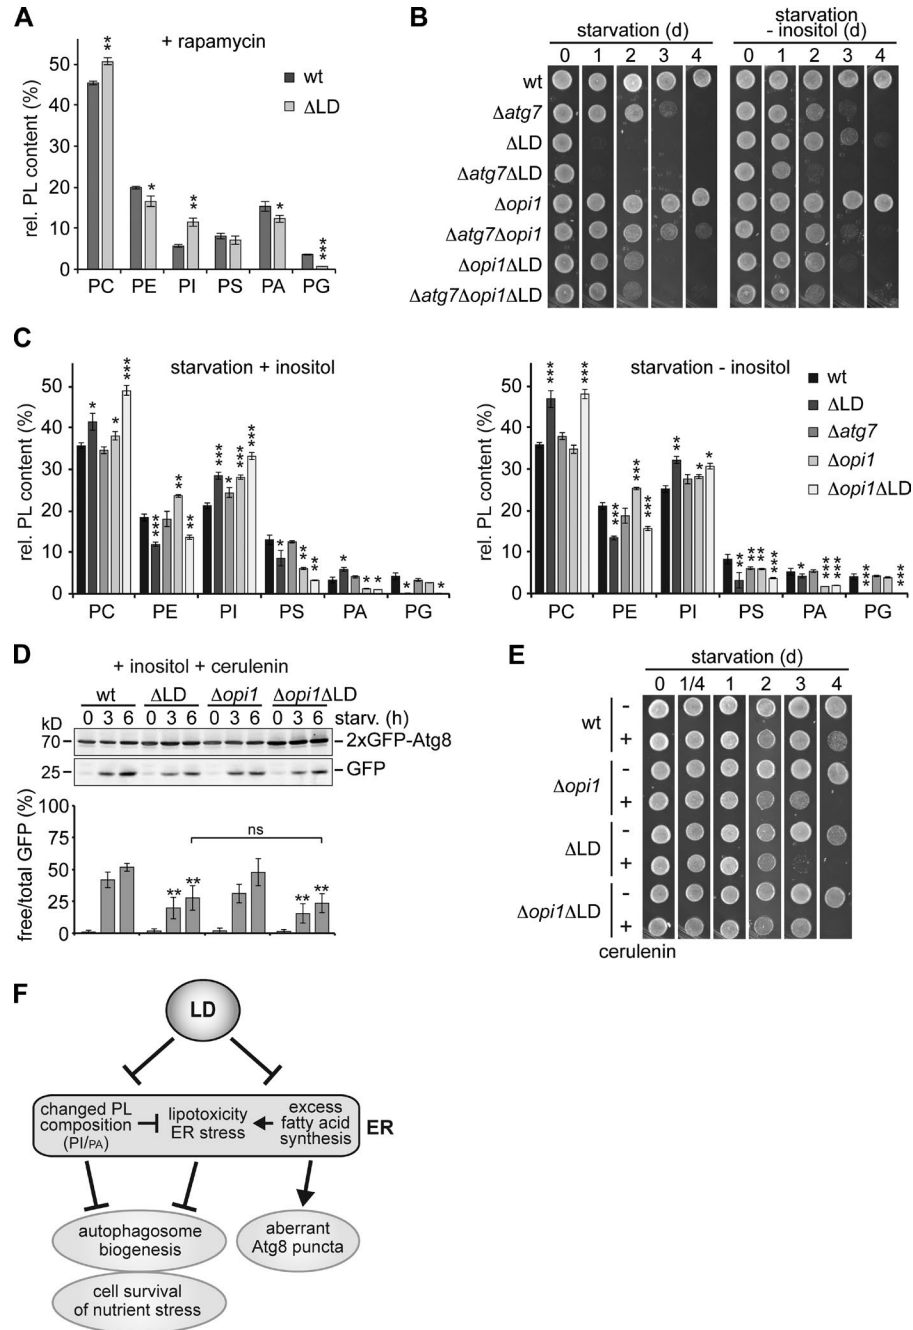

Figure S2. **Additional characterization of PL composition, cell survival, autophagy flux of LD-deficient cells in dependence of OPI1, and FA synthesis.** (A) wt and  $\Delta$ LD cells were treated with rapamycin for 6 h, and PLs were analyzed by mass spectrometry as described in the Materials and methods. Relative (rel.) distribution of PC, PE, PI, PS, PA, and PG is shown as means  $\pm$  SD ( $n = 3$ ). (B) Survival of indicated strains during starvation  $\pm$  inositol (2 mg/l). (C) wt,  $\Delta$ LD,  $\Delta$ atg7,  $\Delta$ opi1, and  $\Delta$ opi1 $\Delta$ LD cells were starved  $\pm$  inositol (2 mg/l) for 6 h, and PLs were analyzed as in A. (D) Autophagy flux in wt,  $\Delta$ LD,  $\Delta$ opi1, and  $\Delta$ opi1 $\Delta$ LD cells starved (starv.) in the presence of cerulenin (10  $\mu$ g/ml). Data are means  $\pm$  SDs ( $n = 4$ ). (E) Survival of indicated strains during starvation  $\pm$  cerulenin (10  $\mu$ g/ml) in inositol-free media. (F) Model for LD-mediated ER homeostasis required for autophagy and cell survival during nutrient stress. *t* test in A, C, and D: \*,  $P < 0.05$ ; \*\*,  $P < 0.01$ ; \*\*\*,  $P < 0.001$ .

Table S1. *S. cerevisiae* strains used in this study

| Name  | Genotype                                                                                                                                           |
|-------|----------------------------------------------------------------------------------------------------------------------------------------------------|
| YMG1  | w303 <i>ade2-1 leu2-3 his3-11,15 trp1-1 ura3-1 can1-100</i>                                                                                        |
| YMG2  | w303 $\Delta$ atg7::kanMX6                                                                                                                         |
| YMG3  | w303 $\Delta$ dga1::TRP1 $\Delta$ lro1::HIS3                                                                                                       |
| YMG4  | w303 $\Delta$ are1::TRP1 $\Delta$ are2::HIS3                                                                                                       |
| YMG5  | w303 $\Delta$ dga1::TRP1 $\Delta$ lro1::HIS3 $\Delta$ are1::TRP1 $\Delta$ are2::HIS3                                                               |
| YMG6  | w303 $\Delta$ opi1::natMX6                                                                                                                         |
| YMG7  | w303 $\Delta$ dga1::TRP1 $\Delta$ lro1::HIS3 $\Delta$ are1::TRP1 $\Delta$ are2::HIS3 $\Delta$ opi1::natMX6                                         |
| YMG8  | w303 pRS306-pr <sup>ATG8</sup> -2xyEGFP-ATG8                                                                                                       |
| YMG9  | w303 $\Delta$ atg7::kanMX4 pRS306-pr <sup>ATG8</sup> -2xyEGFP-ATG8                                                                                 |
| YMG10 | w303 $\Delta$ dga1::TRP1 $\Delta$ lro1::HIS3 pRS306-pr <sup>ATG8</sup> -2xyEGFP-ATG8                                                               |
| YMG11 | w303 $\Delta$ are1::TRP1 $\Delta$ are2::HIS3 pRS306-pr <sup>ATG8</sup> -2xyEGFP-ATG8                                                               |
| YMG12 | w303 $\Delta$ dga1::TRP1 $\Delta$ lro1::HIS3 $\Delta$ are1::TRP1 $\Delta$ are2::HIS3 pRS306-pr <sup>ATG8</sup> -2xyEGFP-ATG8                       |
| YMG13 | w303 $\Delta$ opi1::natMX6 pRS306-pr <sup>ATG8</sup> -2xyEGFP-ATG8                                                                                 |
| YMG14 | w303 $\Delta$ dga1::TRP1 $\Delta$ lro1::HIS3 $\Delta$ are1::TRP1 $\Delta$ are2::HIS3 $\Delta$ opi1::natMX6 pRS306-pr <sup>ATG8</sup> -2xyEGFP-ATG8 |
| YMG15 | w303 $\Delta$ ura3::4xUPRE-GFP-URA3                                                                                                                |
| YMG16 | w303 $\Delta$ atg7::kanMX6 $\Delta$ ura3::4xUPRE-GFP-URA3                                                                                          |
| YMG17 | w303 $\Delta$ dga1::TRP1 $\Delta$ lro1::HIS3 $\Delta$ ura3::4xUPRE-GFP-URA3                                                                        |
| YMG18 | w303 $\Delta$ are1::TRP1 $\Delta$ are2::HIS3 $\Delta$ ura3::4xUPRE-GFP-URA3                                                                        |
| YMG19 | w303 $\Delta$ dga1::TRP1 $\Delta$ lro1::HIS3 $\Delta$ are1::TRP1 $\Delta$ are2::HIS3 $\Delta$ ura3::4xUPRE-GFP-URA3                                |
| YMG20 | w303 $\Delta$ opi1::natMX6 $\Delta$ ura3::4xUPRE-GFP-URA3                                                                                          |
| YMG21 | w303 $\Delta$ dga1::TRP1 $\Delta$ lro1::HIS3 $\Delta$ are1::TRP1 $\Delta$ are2::HIS3 $\Delta$ opi1::natMX6 $\Delta$ ura3::4xUPRE-GFP-URA3          |
| YMG22 | w303 $\Delta$ ire1::natMX6 pRS306-pr <sup>ATG8</sup> -2xyEGFP-ATG8                                                                                 |
| YMG23 | w303 $\Delta$ hac1::natMX6 pRS306-pr <sup>ATG8</sup> -2xyEGFP-ATG8                                                                                 |
| YMG24 | w303 $\Delta$ dga1::TRP1 $\Delta$ lro1::HIS3 $\Delta$ are1::TRP1 $\Delta$ are2::HIS3 $\Delta$ ire1::natMX6 pRS306-pr <sup>ATG8</sup> -2xyEGFP-ATG8 |
| YMG25 | w303 $\Delta$ dga1::TRP1 $\Delta$ lro1::HIS3 $\Delta$ are1::TRP1 $\Delta$ are2::HIS3 $\Delta$ hac1::natMX6 pRS306-pr <sup>ATG8</sup> -2xyEGFP-ATG8 |
| YMG26 | w303 $\Delta$ ire1::natMX6 pRS306-pr <sup>ATG8</sup> -2xyEGFP-ATG8 pRS315-prIRE1-IRE1                                                              |
| YMG27 | w303 $\Delta$ ire1::natMX6 pRS306-pr <sup>ATG8</sup> -2xyEGFP-ATG8 pRS315-prIRE1-ire1C                                                             |
| YMG28 | w303 INO1-3xHA-kanMX6                                                                                                                              |
| YMG29 | w303 $\Delta$ dga1::TRP1 $\Delta$ lro1::HIS3 $\Delta$ are1::TRP1 $\Delta$ are2::HIS3 INO1-3xHA-kanMX6                                              |
| YMG30 | w303 SEC13-mCherry-kanMX6 pRS306-pr <sup>ATG8</sup> -2xyEGFP-ATG8                                                                                  |
| YMG31 | w303 $\Delta$ dga1::TRP1 $\Delta$ lro1::HIS3 $\Delta$ are1::TRP1 $\Delta$ are2::HIS3 SEC13-mCherry-kanMX6 pRS306-pr <sup>ATG8</sup> -2xyEGFP-ATG8  |
| YMG32 | w303 $\Delta$ dga1::TRP1 $\Delta$ lro1::HIS3 $\Delta$ are1::TRP1 $\Delta$ are2::HIS3 $\Delta$ atg7::kanMX4                                         |
| YMG33 | w303 pRS305-yEGFP-HDEL                                                                                                                             |
| YMG34 | w303 $\Delta$ dga1::TRP1 $\Delta$ lro1::HIS3 $\Delta$ are1::TRP1 $\Delta$ are2::HIS3 pRS305-yEGFP-HDEL                                             |
| YMG35 | w303 $\Delta$ opi1::natMX6 pRS305-yEGFP-HDEL                                                                                                       |
| YMG36 | w303 $\Delta$ dga1::TRP1 $\Delta$ lro1::HIS3 $\Delta$ are1::TRP1 $\Delta$ are2::HIS3 $\Delta$ opi1::natMX6 pRS305-yEGFP-HDEL                       |
| YMG37 | w303 pRS315-pr <sup>ADH1</sup> -pHluorin-mCherry                                                                                                   |
| YMG38 | w303 $\Delta$ dga1::TRP1 $\Delta$ lro1::HIS3 $\Delta$ are1::TRP1 $\Delta$ are2::HIS3 pRS315-pr <sup>ADH1</sup> -pHluorin-mCherry                   |
| YMG39 | w303 $\Delta$ atg7::kanMX6 pRS315-pr <sup>ADH1</sup> -pHluorin-mCherry                                                                             |
| YMG40 | w303 $\Delta$ opi1::natMX6 $\Delta$ atg7::kanMX4                                                                                                   |
| YMG41 | w303 $\Delta$ dga1::TRP1 $\Delta$ lro1::HIS3 $\Delta$ are1::TRP1 $\Delta$ are2::HIS3 $\Delta$ opi1::natMX6 $\Delta$ atg7::kanMX4                   |
